## CORRESPONDENCE

Anesthesiology  
83:639, 1995  
© 1995 American Society of Anesthesiologists, Inc.  
Lippincott-Raven Publishers

### Double-Lumen Tube Malfunction Caused by the Carinal Hook

*To the Editor:*—Potential problems with carinal hooks include increased difficulty passing the tube through the larynx, laryngeal trauma, amputation of the hook during passage, malpositioning of the tube due to the hook and physical interference when performing a pneumonectomy.<sup>1</sup> We present a case in which tracheal tube orifice obstruction was caused by a carinal hook in a left-sided Carlens double-lumen tube (DLT).

A 57-yr-old woman was scheduled for a left upper lobectomy. Her medical history was unremarkable, and her height and weight were 165 cm and 74 kg, respectively. Chest x-ray and computed tomography scan showed normal airway anatomy except for a space-occupying lesion in the left upper lobe. After induction of general anesthesia and obtaining adequate muscle relaxation, a well lubricated 35-French left-sided polyvinylchloride Carlens DLT (Rüsch, Kernen, Germany) was inserted and rotated using standard technique.<sup>2</sup> After advancing the DLT and encountering some resistance, the tracheal and bronchial cuffs were inflated. Although ventilation of both lumens was attempted, breath sounds were heard only over the left hemithorax, and greater than expected resistance to manual ventilation was detected. A deep insertion of the DLT into the left main bronchus was suspected, the cuffs were deflated, and the tube was pulled back slowly until bilateral breath sounds appeared. Ventilation was possible *via* the bronchial orifice only, and attempts to

ventilate the tracheal lumen failed because of high resistance. A fiberoptic examination demonstrated an intact bronchial lumen, but the distal end of the tracheal lumen was obstructed. The DLT was pulled back, and the trachea was extubated. On examination of the DLT, an obstruction of the distal aperture of the tracheal lumen caused by the carinal hook was noted (fig. 1, top).

The exact mechanism leading to this type of DLT obstruction is obscure. Possible sites that could bend the carinal hook back at an angle of 180° include rigid structures and narrow passages, *e.g.*, teeth and vocal cords. However, we speculate that the DLT was advanced too deeply into the left main bronchus. At this point, the hook was bent back by the carina and trapped in the distal orifice of the tracheal lumen. When the DLT was withdrawn to facilitate bilateral lung ventilation, the distal bronchial portion of the DLT straightened, thus further impacting the hook into the tracheal aperture.

This case has demonstrated that carinal hooks in the Carlens DLT can be a hazardous source of tube obstruction. We recommend that close surveillance of this DLT is warranted and that a fiberoptic endoscope should be used routinely in conjunction with it.

**Yaakov Pollak, M.D.**  
**Alexander Kogan, M.D.**  
**Zvi Grunwald, M.D.**  
Department of Anesthesiology  
Beilinson Medical Center  
Petah-Tikva, 49100, Israel

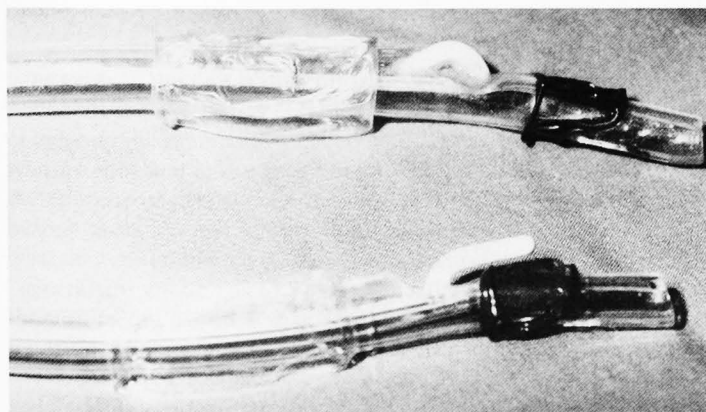

**Fig. 1.** Tips of an intact (bottom) and malfunctioning Carlens double-lumen tube (top). The carinal hook is bent backward into the distal tracheal aperture.

Anesthesiology  
83:639-640, 1995  
© 1995 American Society of Anesthesiologists, Inc.  
Lippincott-Raven Publishers

### How Well Is Patient-controlled Analgesia Managed?

*To the Editor:*—In a letter to the editor,<sup>1</sup> Ready attempted to define which health-care providers are managing patient-controlled analgesia (PCA). He reports that 73% of responding institutions have an anes-

### References

1. Benumof JL: Double lumen tube intubation: Separation of the two lungs (double-lumen tube and bronchial blocker intubation). *Anesthesia for Thoracic Surgery*. Philadelphia, WB Saunders, 1995, pp 334-335
2. Benumof JL, Alfery DD: *Anesthesia for thoracic surgery*. Anesthesia. Edited by Miller RD. New York, Churchill Livingstone, 1986, p 1399

(Accepted for publication May 27, 1995.)

esthesiology-based acute pain service (APS). However, the data are misleading. Table 1 indicates that 236 institutions have an anesthesia-based APS, whereas table 2 lists 221 institutions with anesthesiologists

## CORRESPONDENCE

participating in the management of PCA. Additionally, based on table 2, the number of institutions indicating their participation in PCA is greater than the number of institutions responding to the survey. From this, we infer that there is an overlap of the groups participating in the management of PCA. However, it is unclear which groups overlap and which have primary responsibility for PCA management. Those with the responsibility will determine the quality of care and ultimately, perhaps, patient outcome.

**Sandra R. Weitz, M.D.**  
Director, Acute Pain Service  
Department of Anesthesia, S-436  
University of California, San Francisco

Anesthesiology  
83:640, 1995  
© 1995 American Society of Anesthesiologists, Inc.  
Lippincott-Raven Publishers

*In Reply:*—Weitz suggests the data in my survey<sup>1</sup> are misleading. I would say rather that they may require additional interpretation.

It was noted that 236 institutions reported having an anesthesiology-based acute pain service, whereas 221 institutions reported that anesthesiologists manage patient-controlled analgesia (PCA). That indicates to me that 15 of the anesthesiology-based acute pain services identified are not managing PCA but provide other forms of analgesia. I am aware of numerous institutions that function in such a manner.

Table 2 lists the therapist group or groups reported to manage PCA by the survey respondents. In some institutions, there was only one group; in others, there were several. When there were a number of therapist groups involved in one institution, each that was identified contributed to the number of responses seen in table 2. The total of the responses therefore is greater than the number of institutions that indicate they offer PCA. The design of the survey was short and simple. An advantage of that approach was a respectable response rate; a disadvantage, as Weitz points out, is a lack of more detailed information about PCA management behaviors.

Anesthesiology  
83:640-641, 1995  
© 1995 American Society of Anesthesiologists, Inc.  
Lippincott-Raven Publishers

## More on the Language of Anesthesia

*To the Editor:*—I disagree with the comments made on terminology in the correspondence by Ben-David *et al.*<sup>1</sup> These authors state that the terms "general anesthesia," "conscious sedation," and "combined technique" "confuse and frustrate communication [and create] a linguistic trap with wide ramifications." The patients I interview have no difficulty with these terms or the concepts that they represent. Simply put, a general anesthetic is a drug-induced loss of consciousness, administered usually for the purposes of performing an otherwise unpleasant surgical procedure. Our own definition

within the specialty may refer to muscular relaxation and reduction of reflex activity, but those descriptions are unnecessary during discussions with patients. Whether the entire autonomic and hormonal response to a surgical procedure is blocked by the general anesthetic is irrelevant to the patient as long as there is no awareness of pain (Ben-David *et al.* misuse the word pain, which is a conscious sensation). It may be true that the nervous system is not entirely insensitive, but with adequate anesthesia, the patient does not move in response to a supramaximal stimulus, *e.g.*, the patient appears to be

521 Parnassus Avenue  
San Francisco, California 94143-0648

## Reference

1. Ready LB: How many acute pain services are there in the United States, and who is managing patient-controlled analgesia? (letter). *ANESTHESIOLOGY* 82:322, 1995

(Accepted for publication May 27, 1995.)

**L. Brian Ready, M.D., F.R.C.P.(C.)**  
Professor, Department of Anesthesiology  
Director, University of Washington Medical Center  
Pain Service  
University of Washington  
Box 356540  
Seattle, Washington 98195-6540

## Reference

1. Ready LB: How many acute pain services are there in the United States, and who is managing patient-controlled analgesia? (letter). *ANESTHESIOLOGY* 82:322, 1995

(Accepted for publication May 27, 1995.)

## CORRESPONDENCE

insensitive, and therefore, the word anesthetic is a derivation (an = neg, aisthesis = Greek for consciousness). Conscious sedation is sedation that occurs with consciousness. Although some philosophers may use the term consciousness, it is a common lay word. The presence of self-awareness. If one is sedated, this is "conscious sedation." Finally, the presence of a regional anesthetic but also wants to use the term "conscious sedation." Finally, the procedure can readily understand that a regional method alone. Patients having an epidural anesthesia may be upset if they are not adequately. In these cases, I find it useful to use the term "conscious sedation" with tracheal intubation and controlled sedation. If I would refer to this as "conscious sedation" with deep sedation, it would be "epidural anesthesia with deep sedation." If we say to our patients that we are using an anesthetic, ask them to turn on their side, and insert a needle into their back, I think most patients would ask for a more specific definition of "anesthetic" in this case. I submit that the term "combined anesthetic" is not appropriate with the term "combined anesthetic" advantages this technique offers such

Anesthesiology  
83:641-642, 1995  
© 1995 American Society of Anesthesiologists, Inc.  
Lippincott-Raven Publishers

*In Reply:*—We find it difficult to agree with the authors and his patients have a common understanding of these terms when, as evidenced by the fact that who are educated in the field cannot understand the opposite of his. We commonly use the term "general anesthesia" or "conscious sedation" to describe what they are talking about. They may use the term "general anesthetic" as to a life raft. In the ensuing discussion, it may become clear that the patient does not want to be awake and an empathetic explanation that this is not always successful. This is just one of many examples of how these terms frustrate communication.

As to the definition of "general anesthesia," it is simply a drug-induced loss of consciousness and awareness of pain and the patient's ability to respond to sensory stimuli. Several percent of patients may have awareness and recall during general anesthesia. A figure not much different than that for patients under "local anesthesia with sedation." We agree that nociception under general anesthesia is not per se. This is why we introduce the term "pain per se." "Pain is a conscious sensation." However, with adequate anesthesia, the patient does not move in response to a supramaximal stimulus, *e.g.*, the patient appears to be

Anesthesiology, V 83, No 3, Sep 1995
